# Supplementary material for: Study of a carbazole–bromobenzothiadiazole derived fluorescent molecular rotor: crystal structure, redox activity, and solvatofluorochromic effects
Source: Royal Society of Chemistry journal article supplement (doi:10.1039/d1nj04274b), 2021-12-02
Supplement: d1nj04274b1.pdf [file d1nj04274b1.pdf]

*Electronic Supplementary Information*

**Study of a carbazole–bromobenzothiadiazole derived  
fluorescent molecular rotor: crystal structure, redox  
activity, and solvatofluorochromic effects**

Erin T. Chernick,<sup>\*a</sup> Maryam F. Abdollahi,<sup>b</sup> Zahra A. Tabasi,<sup>b</sup> Marc J. Junge,<sup>c</sup> and Yuming  
Zhao<sup>\*b</sup>

<sup>a</sup> Department of Chemistry, University of Victoria, Victoria, BC, Canada V8W 2Y2. Tel: +1 250  
721 7154; E-mail: [erinchernick@uvic.ca](mailto:erinchernick@uvic.ca)

<sup>b</sup> Department of Chemistry, Memorial University of Newfoundland, St. John's, NL, Canada A1B  
3X7. Fax: 1 709 864 3702; Tel: +1 709 864 8747; Email: [yuming@mun.ca](mailto:yuming@mun.ca)

<sup>c</sup> Institut für Organische Chemie, Universität Tübingen, 72076 Tübingen, Germany

**Table of Content**

|                                                    |     |
|----------------------------------------------------|-----|
| 1. 2D Fingerprint Plots of <b>1</b>                | S-2 |
| 2. DFT and TD-DFT Optimized Geometries of <b>1</b> | S-4 |
| 3. TD-DFT Calculated Results for <b>1</b>          | S-8 |

## 1. 2D Fingerprint Plot of 1

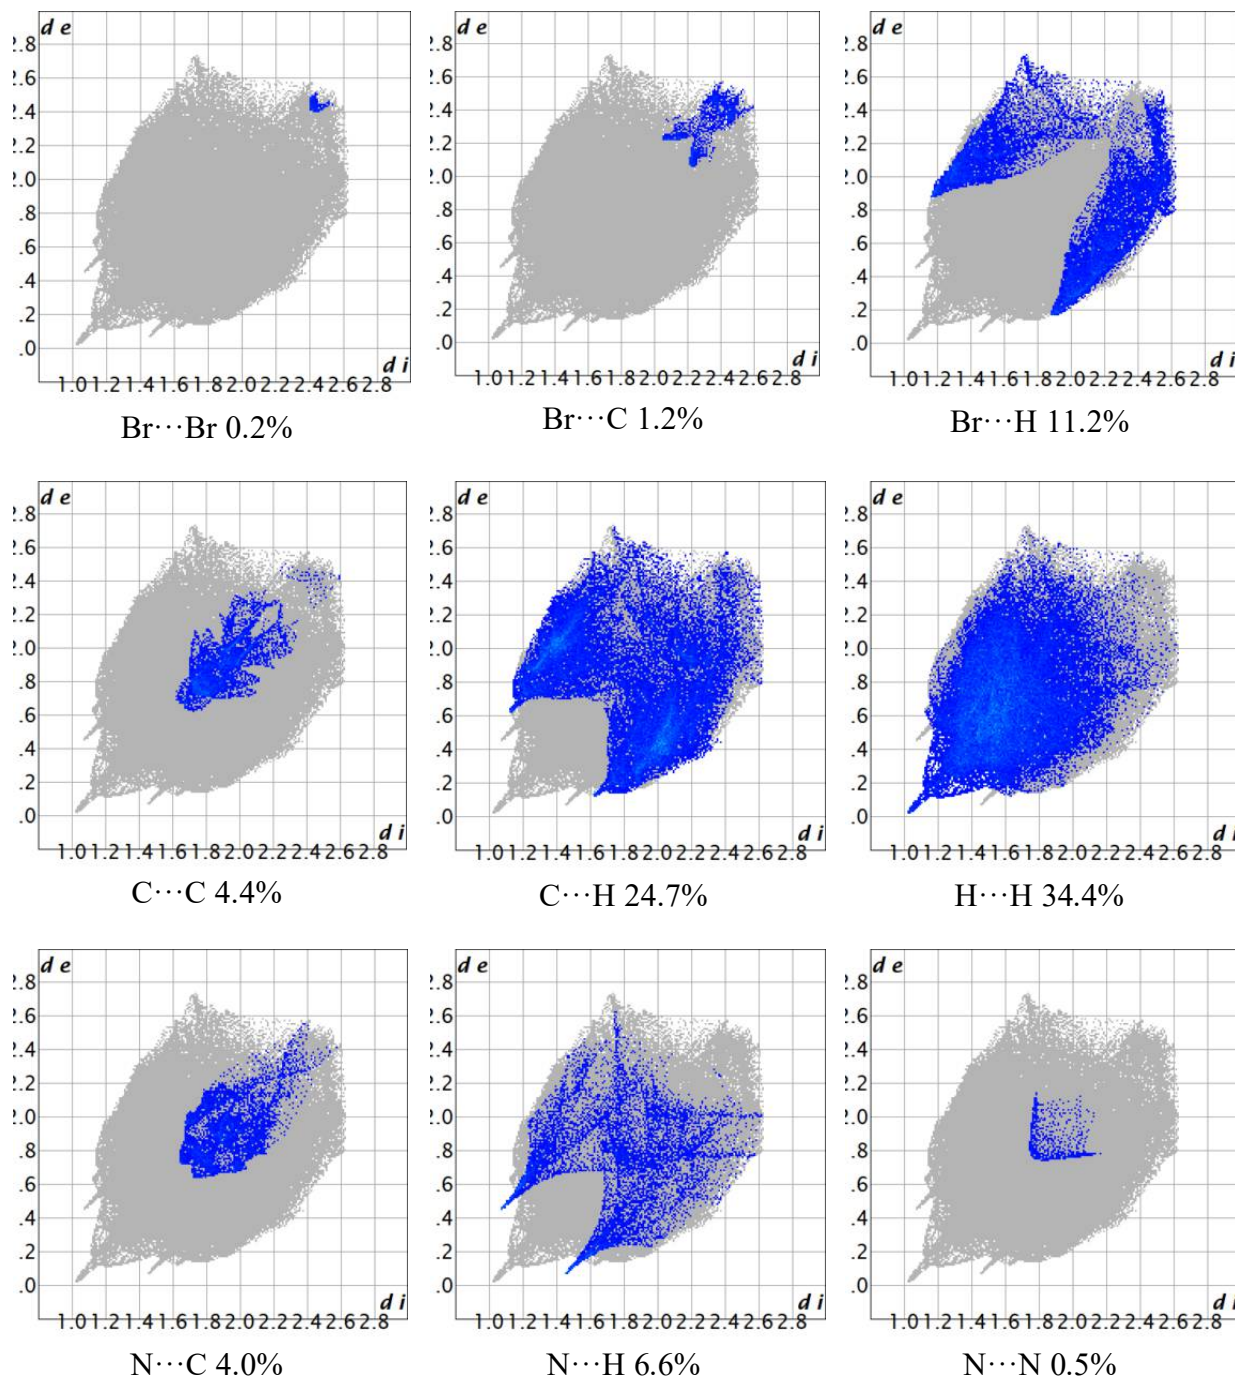

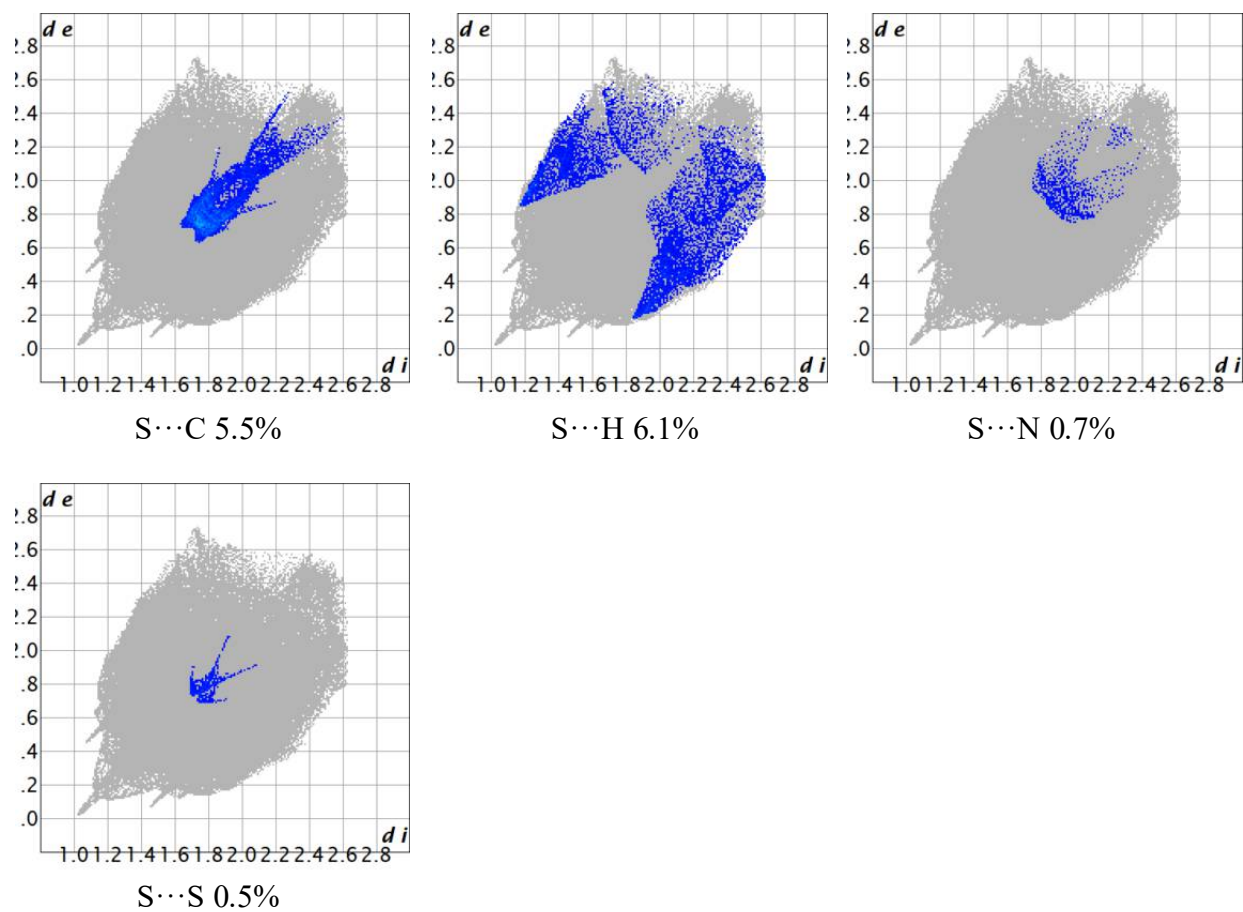

**Figure S-1** 2D fingerprint plots of **1** showing the contributions of different intermolecular contacts.

## 2. DFT and TD-DFT Optimized Geometries of 1

Cartesian coordinates of 1 in the ground state optimized at the B3LYP/6-311+G(2d,p) level

|    |             |             |             |
|----|-------------|-------------|-------------|
| Br | -8.73617700 | 0.24801400  | -0.22221600 |
| S  | -4.77535500 | 2.74105100  | 1.00511300  |
| S  | -1.33606600 | -0.03657500 | -0.04876700 |
| N  | -3.77209900 | 1.50253100  | 0.68097400  |
| N  | -6.20409300 | 2.05980100  | 0.63864000  |
| N  | 5.38428400  | 0.15263300  | -0.03902000 |
| C  | -4.52866000 | 0.48501600  | 0.26163200  |
| C  | -5.94208400 | 0.81313900  | 0.23899500  |
| C  | -6.88055000 | -0.16130300 | -0.18399800 |
| C  | -6.41212300 | -1.38609200 | -0.56797800 |
| H  | -7.10762700 | -2.14292500 | -0.90598100 |
| C  | -5.02987800 | -1.69459200 | -0.55009200 |
| H  | -4.73926400 | -2.67681200 | -0.89836000 |
| C  | -4.05310900 | -0.80946400 | -0.13437100 |
| C  | -2.64555600 | -1.18666000 | -0.10349300 |
| C  | -2.13323600 | -2.46373000 | -0.15050500 |
| H  | -2.76029600 | -3.34581300 | -0.14539800 |
| C  | -0.71985500 | -2.54532400 | -0.15775900 |
| C  | -0.13314500 | -1.29567400 | -0.11115900 |
| C  | 0.00723500  | -3.86288500 | -0.15640900 |
| H  | 0.98816500  | -3.78361200 | 0.31261100  |
| H  | -0.56785200 | -4.61367600 | 0.38925800  |
| H  | 0.15587800  | -4.24497400 | -1.17122800 |
| C  | 1.28815800  | -0.93057000 | -0.08521700 |
| C  | 2.21867300  | -1.57730000 | -0.91114600 |
| H  | 1.88292100  | -2.34087200 | -1.60034300 |
| C  | 3.55938700  | -1.22155400 | -0.89985200 |

|   |            |             |             |
|---|------------|-------------|-------------|
| H | 4.25835600 | -1.71418500 | -1.56412200 |
| C | 4.01292200 | -0.20955600 | -0.05446200 |
| C | 3.09993100 | 0.44440000  | 0.77277000  |
| H | 3.44846200 | 1.21849100  | 1.44482200  |
| C | 1.75919700 | 0.09193400  | 0.75203100  |
| H | 1.06914300 | 0.59689100  | 1.41700500  |
| C | 6.45172200 | -0.69893300 | 0.25406500  |
| C | 6.43711500 | -2.04347900 | 0.61917100  |
| H | 5.50966700 | -2.59462200 | 0.70382500  |
| C | 7.65563700 | -2.65638900 | 0.88018700  |
| H | 7.67027200 | -3.70153200 | 1.16554300  |
| C | 8.86288100 | -1.95139400 | 0.78580700  |
| H | 9.79599800 | -2.45990200 | 0.99486100  |
| C | 8.87074700 | -0.60950600 | 0.43391900  |
| H | 9.80575100 | -0.06499900 | 0.37147100  |
| C | 7.66001700 | 0.03087300  | 0.16663200  |
| C | 7.30636200 | 1.38425000  | -0.19761100 |
| C | 8.04800200 | 2.54062900  | -0.44314200 |
| H | 9.12839400 | 2.52893600  | -0.35802000 |
| C | 7.38540300 | 3.70510600  | -0.80273000 |
| H | 7.94944900 | 4.60946900  | -0.99500200 |
| C | 5.98971600 | 3.72200500  | -0.92635300 |
| H | 5.49192500 | 4.63936000  | -1.21714500 |
| C | 5.22786300 | 2.58581300  | -0.68742900 |
| H | 4.15124700 | 2.60746800  | -0.79458500 |
| C | 5.89751000 | 1.42231900  | -0.31439600 |

Cartesian coordinates of **1** in the first excited state optimized at the TD-B3LYP/6-311+G(2d,p) level

|    |             |            |            |
|----|-------------|------------|------------|
| Br | -8.65956600 | 0.28888000 | 0.06979900 |
|----|-------------|------------|------------|

|   |             |             |             |
|---|-------------|-------------|-------------|
| S | -4.58226300 | 2.86334400  | 0.63236400  |
| S | -1.36047400 | -0.10136300 | -0.00184500 |
| N | -3.60994200 | 1.52738800  | 0.35345600  |
| N | -6.07818400 | 2.15288500  | 0.47630600  |
| N | 5.32718200  | 0.14208200  | -0.00504200 |
| C | -4.45448800 | 0.50030100  | 0.13322300  |
| C | -5.84459900 | 0.85991100  | 0.20358200  |
| C | -6.81206500 | -0.14756800 | -0.01345000 |
| C | -6.42854600 | -1.45202400 | -0.28738200 |
| H | -7.17992100 | -2.21107800 | -0.45330400 |
| C | -5.07656400 | -1.78365900 | -0.35094400 |
| H | -4.81746700 | -2.81067900 | -0.56919500 |
| C | -4.06305900 | -0.83330500 | -0.14492600 |
| C | -2.66815400 | -1.22872200 | -0.21338500 |
| C | -2.15974700 | -2.50421000 | -0.45192800 |
| H | -2.79468800 | -3.36737200 | -0.58989100 |
| C | -0.76405500 | -2.59579700 | -0.48299400 |
| C | -0.15185400 | -1.35386900 | -0.25400200 |
| C | -0.07592100 | -3.91742500 | -0.68471200 |
| H | 0.76724100  | -4.04940300 | -0.00438900 |
| H | -0.77790800 | -4.73349600 | -0.51069500 |
| H | 0.30070900  | -4.02879400 | -1.70651600 |
| C | 1.24340700  | -0.99753300 | -0.19040600 |
| C | 2.26139700  | -1.77488500 | -0.79298500 |
| H | 2.00064900  | -2.65090800 | -1.36581100 |
| C | 3.58920900  | -1.40778200 | -0.72861000 |
| H | 4.33576500  | -2.00222700 | -1.23897400 |
| C | 3.97463100  | -0.23476900 | -0.06517700 |
| C | 2.98396700  | 0.55958200  | 0.53020700  |
| H | 3.26726500  | 1.44826400  | 1.07862600  |

|   |            |             |             |
|---|------------|-------------|-------------|
| C | 1.66026100 | 0.18602600  | 0.46987800  |
| H | 0.92571800 | 0.79909700  | 0.97544400  |
| C | 6.39828800 | -0.69350400 | 0.34174100  |
| C | 6.38377800 | -2.02284900 | 0.75941400  |
| H | 5.46179900 | -2.58080600 | 0.84466100  |
| C | 7.59968800 | -2.61096800 | 1.08560200  |
| H | 7.61578600 | -3.64388700 | 1.41026300  |
| C | 8.79727900 | -1.89240000 | 1.01268900  |
| H | 9.72844800 | -2.37873100 | 1.27476200  |
| C | 8.80184300 | -0.55688100 | 0.62316300  |
| H | 9.72998900 | 0.00080400  | 0.59124700  |
| C | 7.59732200 | 0.05178200  | 0.28804500  |
| C | 7.23975000 | 1.39860100  | -0.11094900 |
| C | 7.98019500 | 2.54928300  | -0.35858900 |
| H | 9.05656600 | 2.55051900  | -0.23640800 |
| C | 7.31883600 | 3.69922600  | -0.77754500 |
| H | 7.88287900 | 4.60278600  | -0.97164500 |
| C | 5.93306000 | 3.69777800  | -0.96616500 |
| H | 5.43995000 | 4.59805500  | -1.31076200 |
| C | 5.17303300 | 2.55915000  | -0.72886800 |
| H | 4.10604000 | 2.56422400  | -0.90216200 |
| C | 5.83750600 | 1.41895100  | -0.28111600 |

### 3. TD-DFT Calculated Results for 1

**Table S-1** Summary of TD-DFT calculated results of 1 at CAM-B3LYP/6-311+G(2d,p) level

| $\lambda$ (nm) | $f$    | MO Contributions                                                                                             |
|----------------|--------|--------------------------------------------------------------------------------------------------------------|
| 413.8          | 0.5364 | H-1 $\rightarrow$ L (51%), H $\rightarrow$ L (44%)                                                           |
| 310.0          | 0.2116 | H-4 $\rightarrow$ L (10%), H-1 $\rightarrow$ L (24%), H $\rightarrow$ L (29%), H $\rightarrow$ L+1 (26%)     |
| 292.7          | 0.1663 | H-3 $\rightarrow$ L (34%), H-1 $\rightarrow$ L+1 (14%), H $\rightarrow$ L (12%), H $\rightarrow$ L+1 (11%)   |
| 290.6          | 0.1216 | H-3 $\rightarrow$ L (18%), H-1 $\rightarrow$ L+2 (16%), H $\rightarrow$ L+2 (49%)                            |
| 289.7          | 0.1432 | H-3 $\rightarrow$ L (28%), H-1 $\rightarrow$ L+1 (11%), H $\rightarrow$ L+1 (20%), H $\rightarrow$ L+2 (14%) |
| 276.2          | 0.2567 | H-7 $\rightarrow$ L (53%), H $\rightarrow$ L+1 (10%)                                                         |
| 273.6          | 0.0156 | H-7 $\rightarrow$ L (17%), H-4 $\rightarrow$ L (45%)                                                         |
| 270.9          | 0.0001 | H-2 $\rightarrow$ L (95%)                                                                                    |
| 265.8          | 0.0428 | H-2 $\rightarrow$ L+2 (23%), H $\rightarrow$ L+3 (51%)                                                       |
| 264.2          | 0.0051 | H-12 $\rightarrow$ L (35%), H-10 $\rightarrow$ L (32%)                                                       |

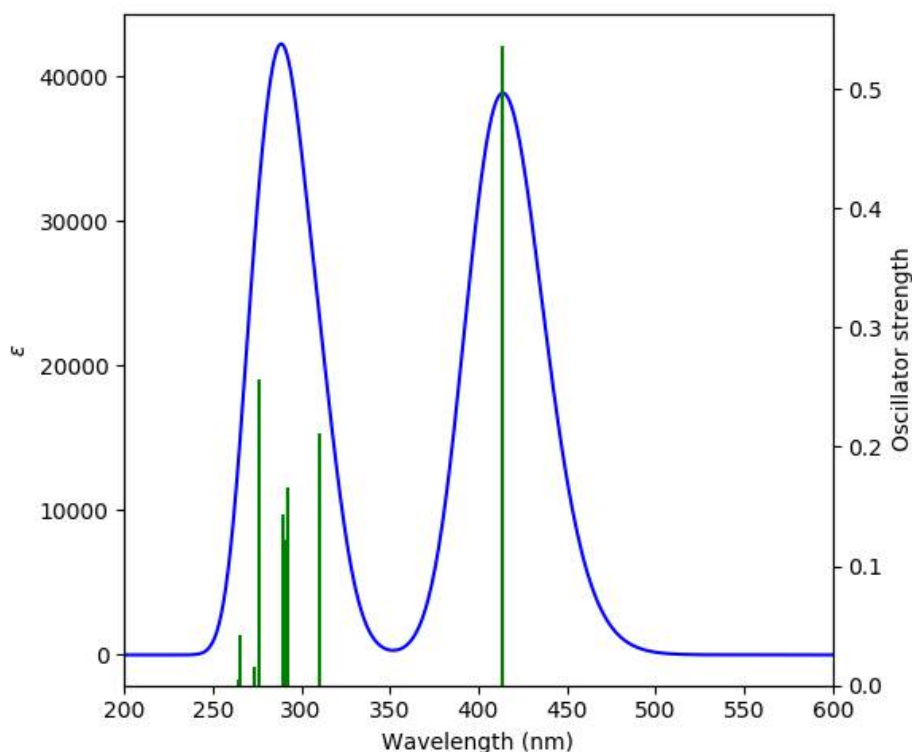

**Figure S-2** TD-DFT calculated UV-Vis absorption spectrum of 1. Simulation done with the GaussSum 3.0 software package.
